# Supplementary material
Source: Springer Nature journal article supplement (https://www.springermedizin.de/resource/supplementary/13031_2009_44_MOESM1_ESM.pdf/9645014)

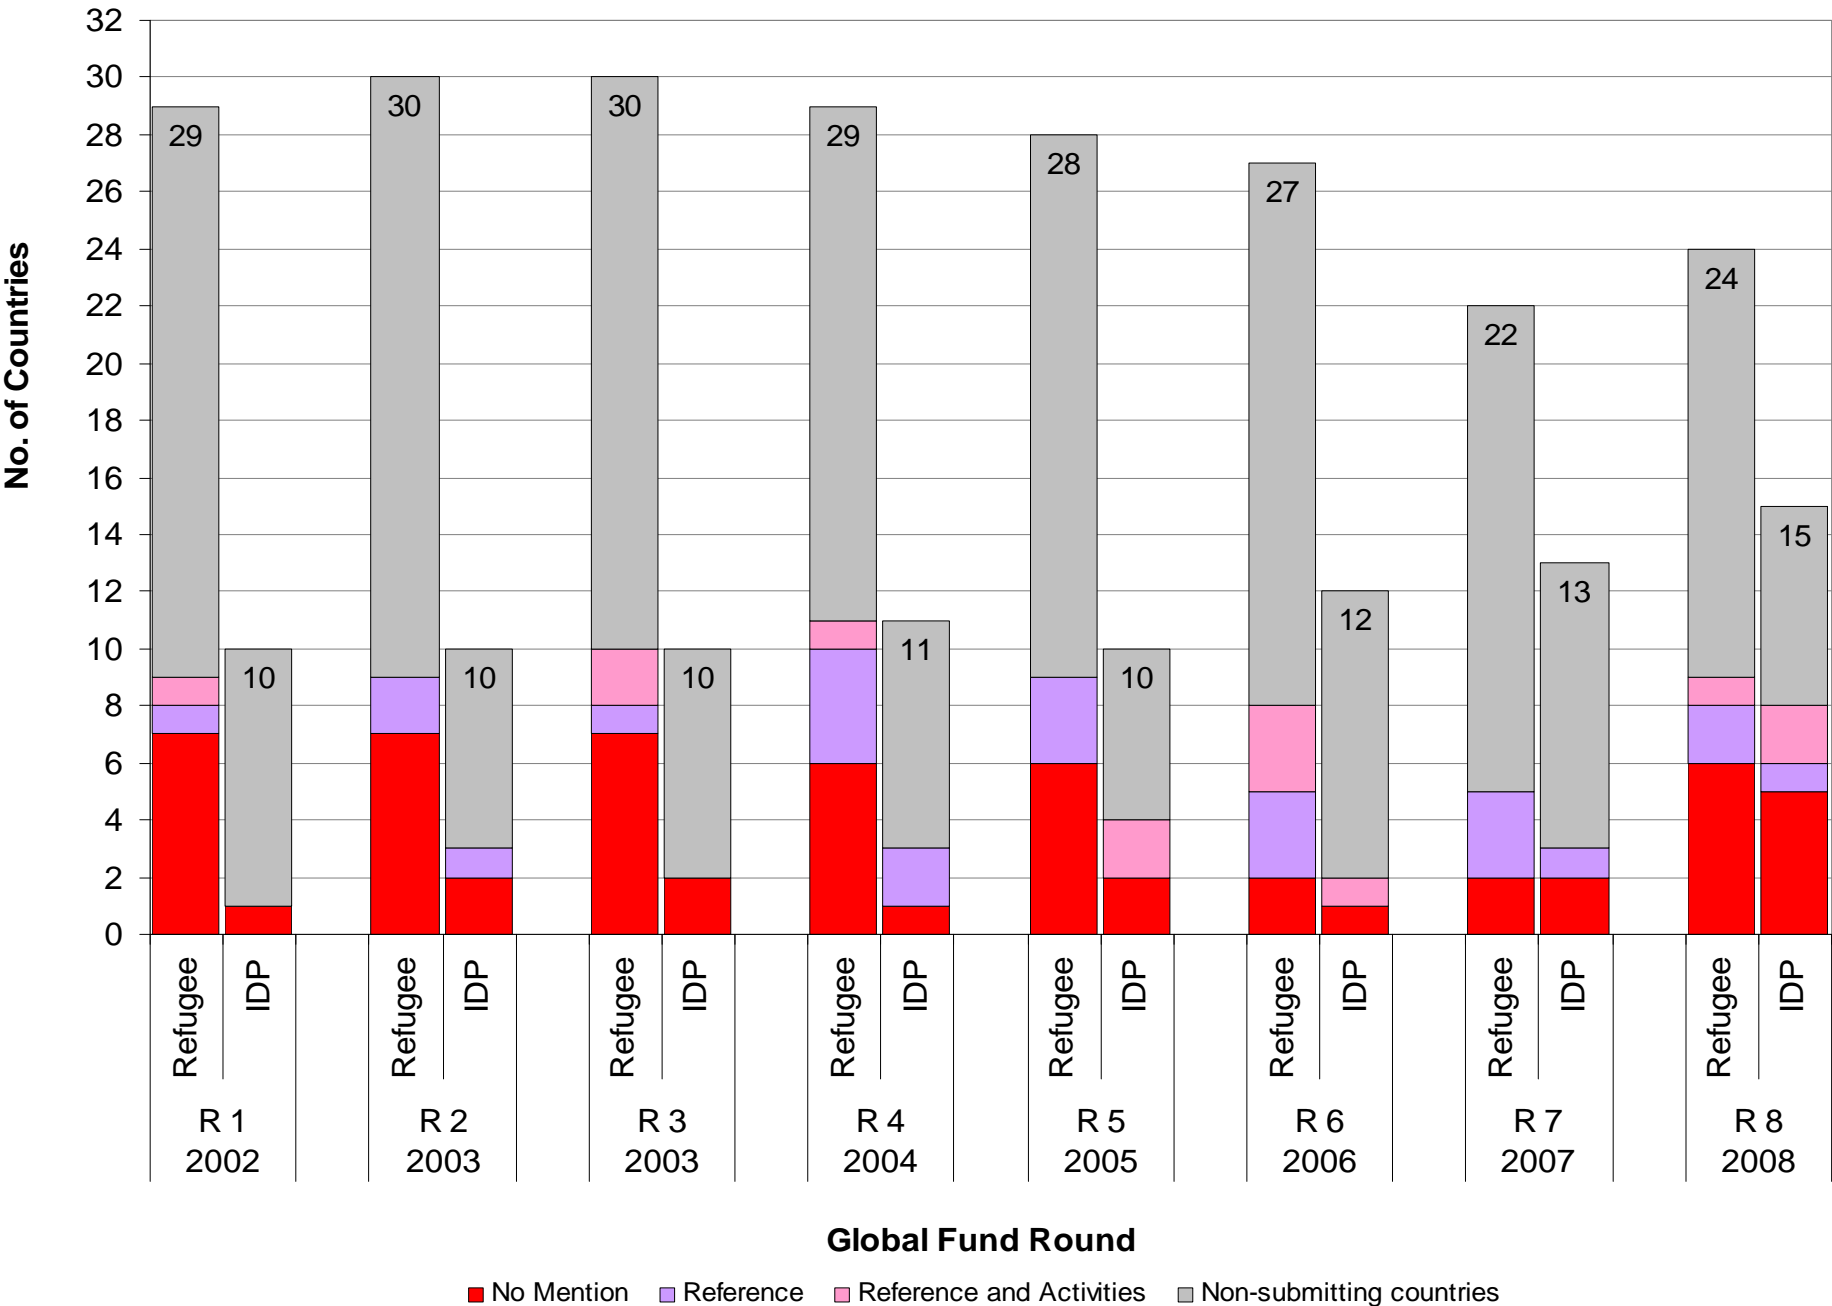

Supplement: MOESM1 [file 9645014]
